# Supplementary material
Source: PubMed Central journal article supplement (PMC3375969)

**Supplementary Figure S2.** A consensus sequence was generated from the alignment of 53 non-recombinant sequences corresponding to the CC domain such that only specific amino acids present in greater than 50% of the sequences represented at a given position in the alignment were retained. This consensus was then used as input for the COILS server.

**A** Using MTIDK matrix, without weighting

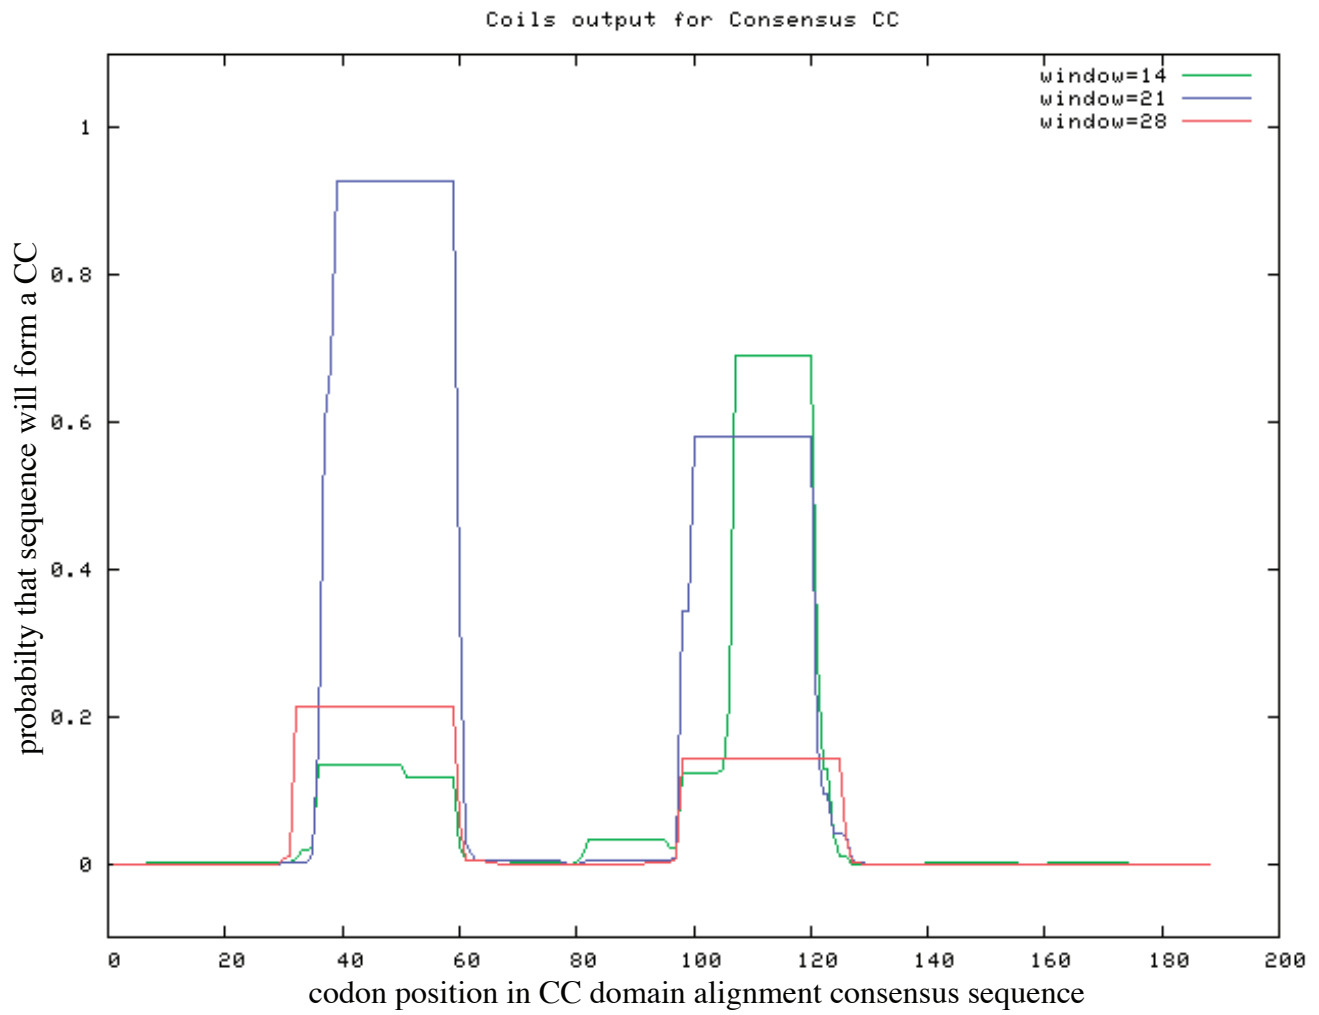

**B** Using MTIDK matrix, with weighting (weights: a,d=2.5 and b,c,e,f,g=1.0)

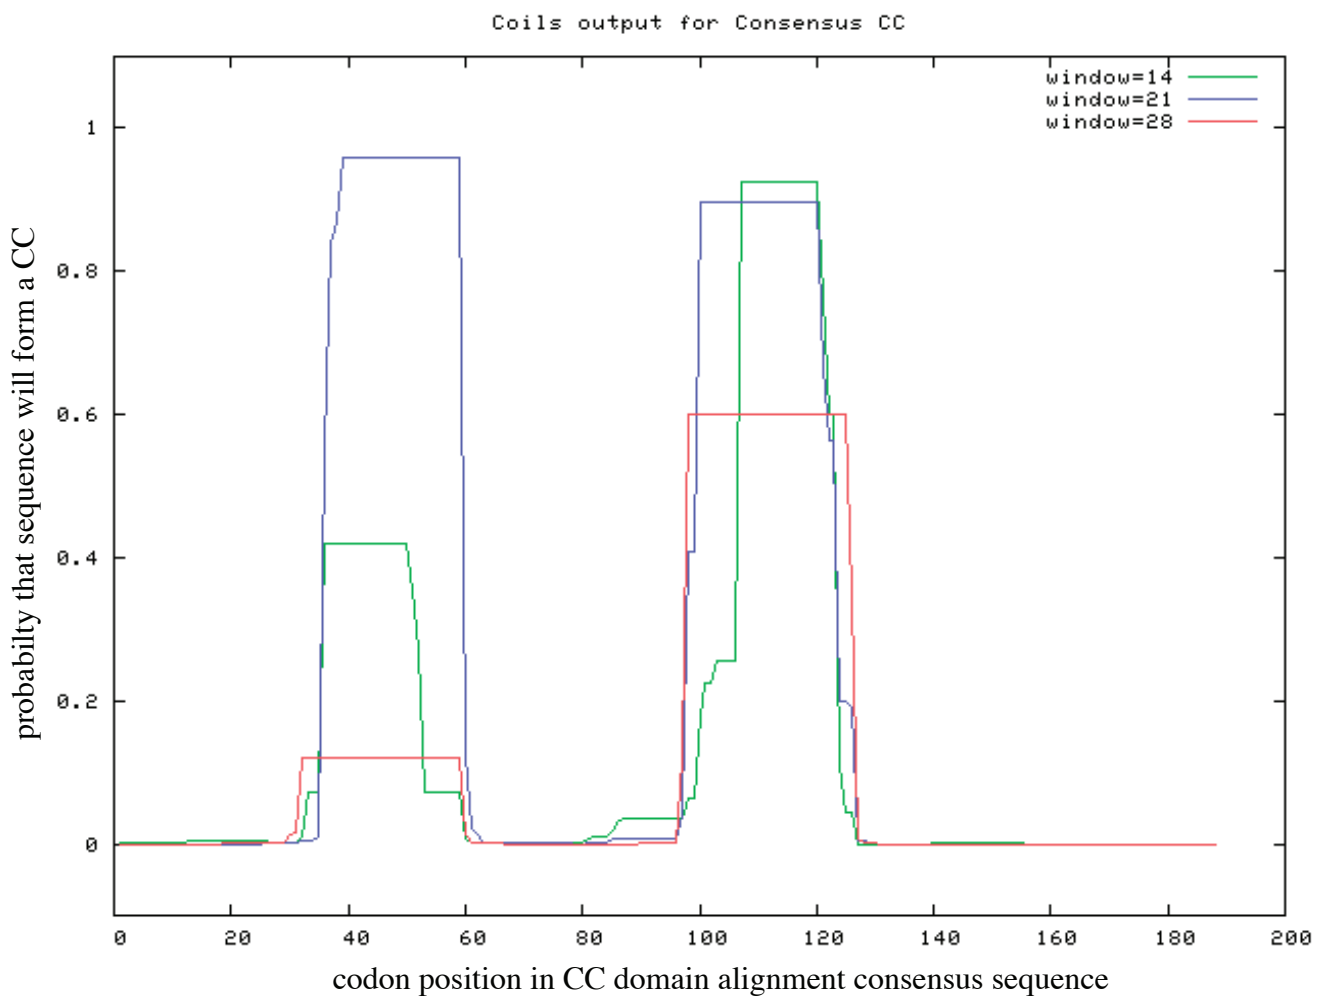

Supplement: supp_pp.112.195040_195040SuplFig_S2_Ashfield.pdf [file supp_pp.112.195040_195040SuplFig_S2_Ashfield.pdf]
